# Supplementary material
Source: publisher figshare collection journal article supplement (https://frontiersin.figshare.com/ndownloader/files/12417182)
Supplement: Supplementary file [file 12417182]

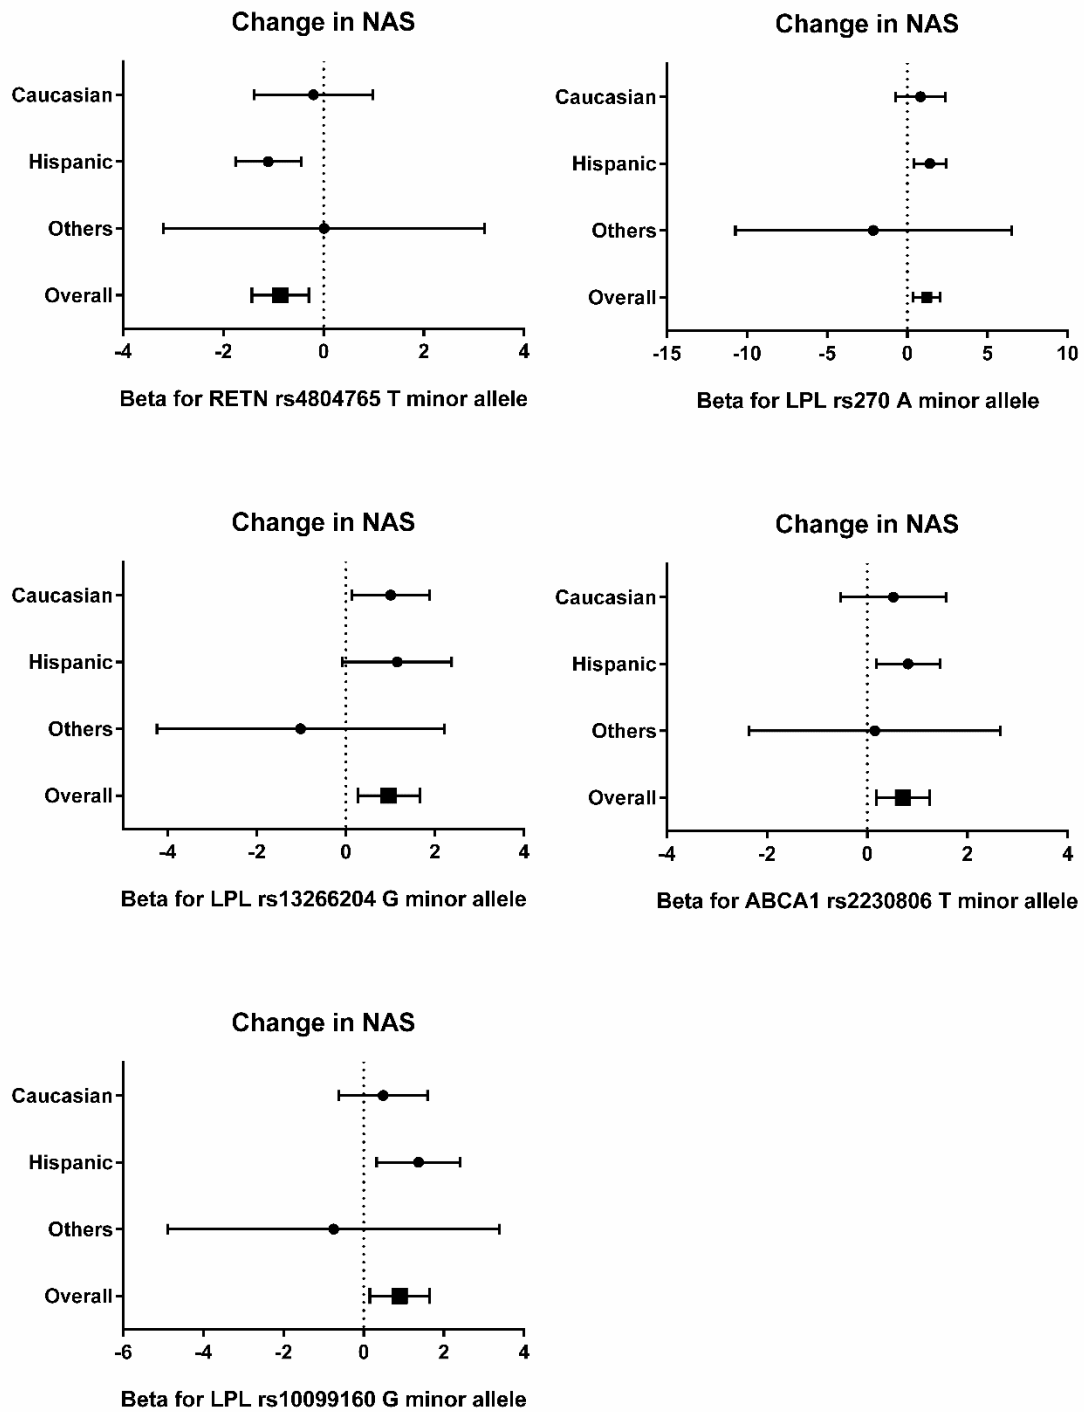

**Figure S6.** Forest plots of the top SNPs for NAS. The analysis is adjusted for age, gender, and baseline NAS.
